# Supplementary material for: Which clinical research questions are the most important? Development and preliminary validation of the Australia & New Zealand Musculoskeletal (ANZMUSC) Clinical Trials Network Research Question Importance Tool (ANZMUSC-RQIT)
Source: PubMed Central journal article supplement (PMC10022765; doi:10.1371/journal.pone.0281308), 2023-03-17
Supplement: pone.0281308.s003.pdf [file pone.0281308.s003.pdf]

S1 Table. Association of Cochrane Risk of Bias dimension categories with Journal Impact Factor group

| <b>Risk of bias dimension</b> | <b>Risk of bias category*</b> | <b>Low Impact journals (count of articles)</b> | <b>High Impact journals (count of articles)</b> | <b>Chi-square (2 df)</b> | <b>Cramer's V</b> | <b>p-value</b> |
|-------------------------------|-------------------------------|------------------------------------------------|-------------------------------------------------|--------------------------|-------------------|----------------|
| Randomisation                 | Low                           | 80                                             | 97                                              | 14                       | 0.27              | <0.001         |
|                               | Some                          | 19                                             | 3                                               |                          |                   |                |
|                               | High                          | 1                                              | 0                                               |                          |                   |                |
| Intervention deviation        | Low                           | 90                                             | 94                                              | 1.2                      | 0.08              | 0.45           |
|                               | Some                          | 4                                              | 2                                               |                          |                   |                |
|                               | High                          | 6                                              | 4                                               |                          |                   |                |
| Missing outcome data          | Low                           | 89                                             | 99                                              | 9.5                      | 0.22              | <0.002         |
|                               | Some                          | 3                                              | 1                                               |                          |                   |                |
|                               | High                          | 8                                              | 0                                               |                          |                   |                |
| Measurement bias              | Low                           | 39                                             | 67                                              | 16                       | 0.28              | <0.001         |
|                               | Some                          | 58                                             | 32                                              |                          |                   |                |
|                               | High                          | 3                                              | 11                                              |                          |                   |                |
| Selective reporting           | Low                           | 86                                             | 99                                              | 13                       | 0.26              | <0.001         |
|                               | Some                          | 2                                              | 1                                               |                          |                   |                |
|                               | High                          | 12                                             | 0                                               |                          |                   |                |
| Overall risk of bias          | Low                           | 28                                             | 67                                              | 34                       | 0.41              | <0.001         |
|                               | Some                          | 47                                             | 28                                              |                          |                   |                |

|  |      |    |   |  |  |  |
|--|------|----|---|--|--|--|
|  | High | 25 | 5 |  |  |  |
|--|------|----|---|--|--|--|

# Low = low risk of bias, Some = some concerns, High = high risk of bias
